# Supplementary material for: Employment of Patients With Kidney Failure Treated With Dialysis or Kidney Transplantation - A Systematic Review and Meta-Analysis
Source: Research Square preprint supplement (doi:10.21203/rs.3.rs-147522/v1), 2021-01-22
Supplement: Supplementary file 1 [file be8c6e70fef3b570580b4ab2.docx]

**Employment of patients with kidney failure treated with dialysis or kidney transplantation - A systematic review and meta-analysis**

**SUPPLEMENTARY MATERIAL**

Lilli Kirkeskov, MD., Ph.D., MPM1*, Rasmus K. Carlsen, MD.2, Thomas Lund, Ph.D.1,3, Niels Henrik Buus, MD., Ph.D. Associate professor4

1. Centre of Social Medicine, University Hospital Bispebjerg-Frederiksberg, Copenhagen, Denmark
2. Department of Transplantation Medicine, Oslo University Hospital, Norway
3. Department of Public Health, University of Copenhagen, Denmark
4. Department of Renal Medicine, Aarhus University Hospital, Denmark
